# Supplementary material for: Well-defined labile diselenide-centered poly(ε-caprolactone)-based micelles for activated intracellular drug release
Source: Royal Society of Chemistry journal article supplement (doi:10.1039/c6tb01040g), 2016-01-01
Supplement: c6tb01040g1.pdf [file c6tb01040g1.pdf]

## Electronic Supplementary Information (ESI)

### **Well-Defined $\epsilon$ -Labile Diselenide-Centered Poly( $\epsilon$ - caprolactone)-based micelles for Activated Intracellular Drug Release**

Chao Wei,<sup>a</sup> Yan Zhang,<sup>a,\*</sup> Heng Xu,<sup>c</sup> Ying Xu,<sup>a</sup> Yue Xu<sup>a</sup> and Meidong Lang<sup>a,b,\*</sup>

<sup>a</sup> *Key Laboratory for Ultrafine Materials of Ministry of Education, School of Materials and Science and Engineering, East China University of Science and Technology. Shanghai, 200237, China*

<sup>b</sup> *Shanghai Collaborative Innovation Center for Biomanufacturing, 130 Meilong Road, Shanghai 200237, China*

<sup>c</sup> *Collaborative Innovation Center for Petrochemical New Materials, Anqing, Anhui 246011, China*

\* *E-mail: zhang\_yan@ecust.edu.cn; Tel: +86-21-65243432;*

\* *E-mail: mdlang@ecust.edu.cn; Tel: +86-21-65243916;*

**Supplementary figures:**

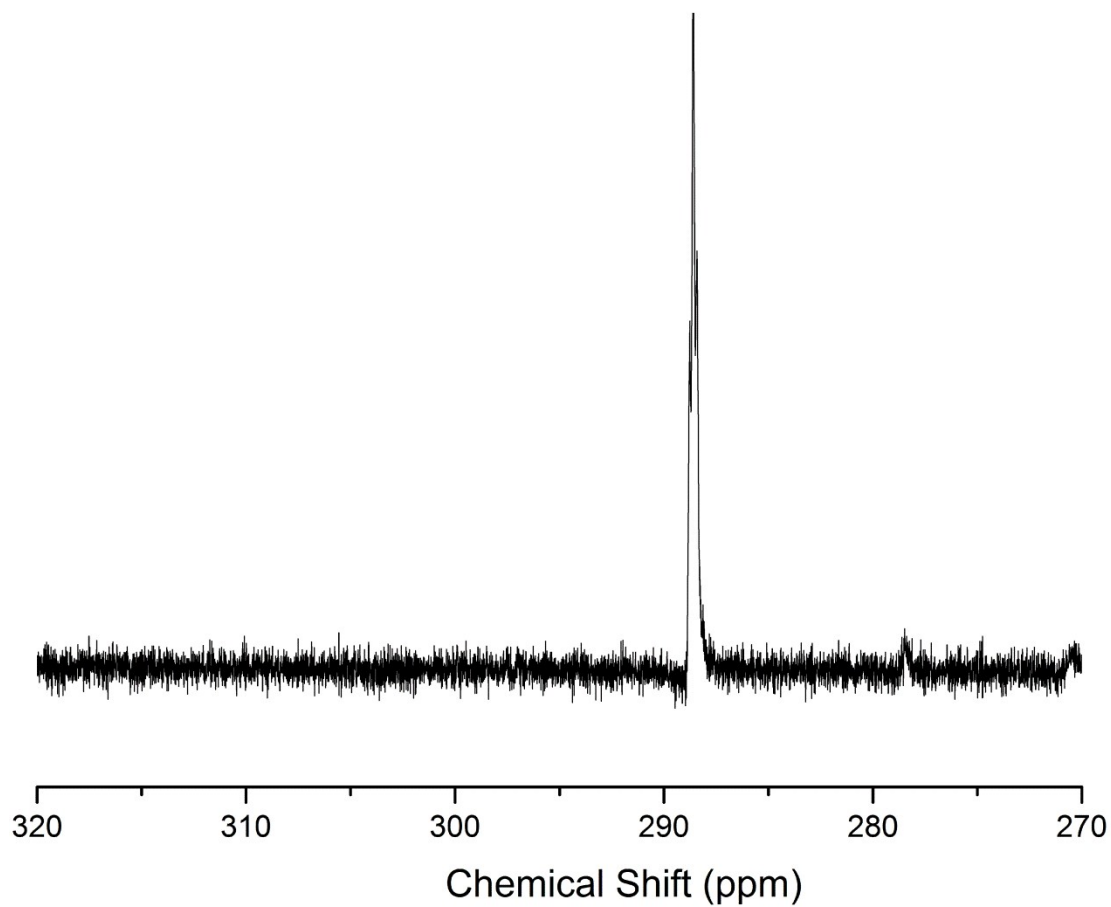

Figure S1.  $^{77}\text{Se}$  NMR spectra of  $(\text{mPEG-PCL-Se})_2$ .

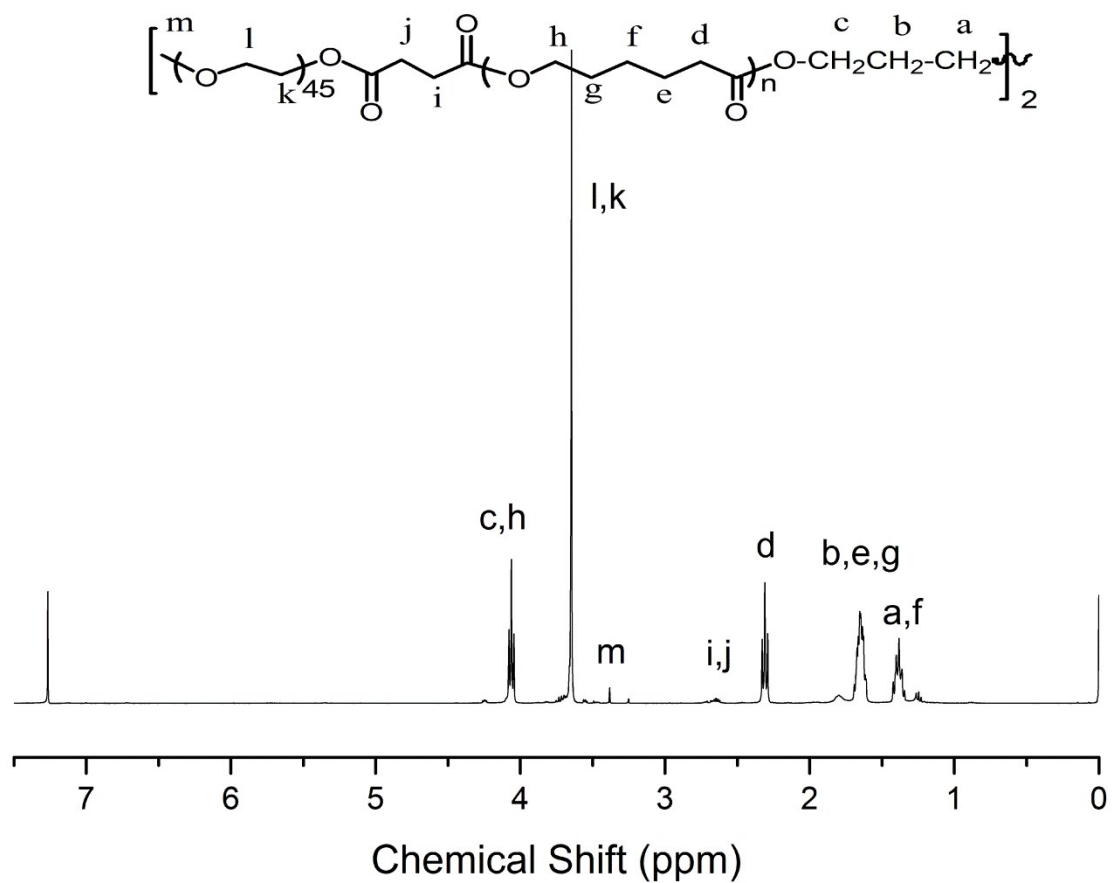

Figure S2.  $^1\text{H NMR}$  spectra of  $(m\text{PEG-PCL-C})_2$ .

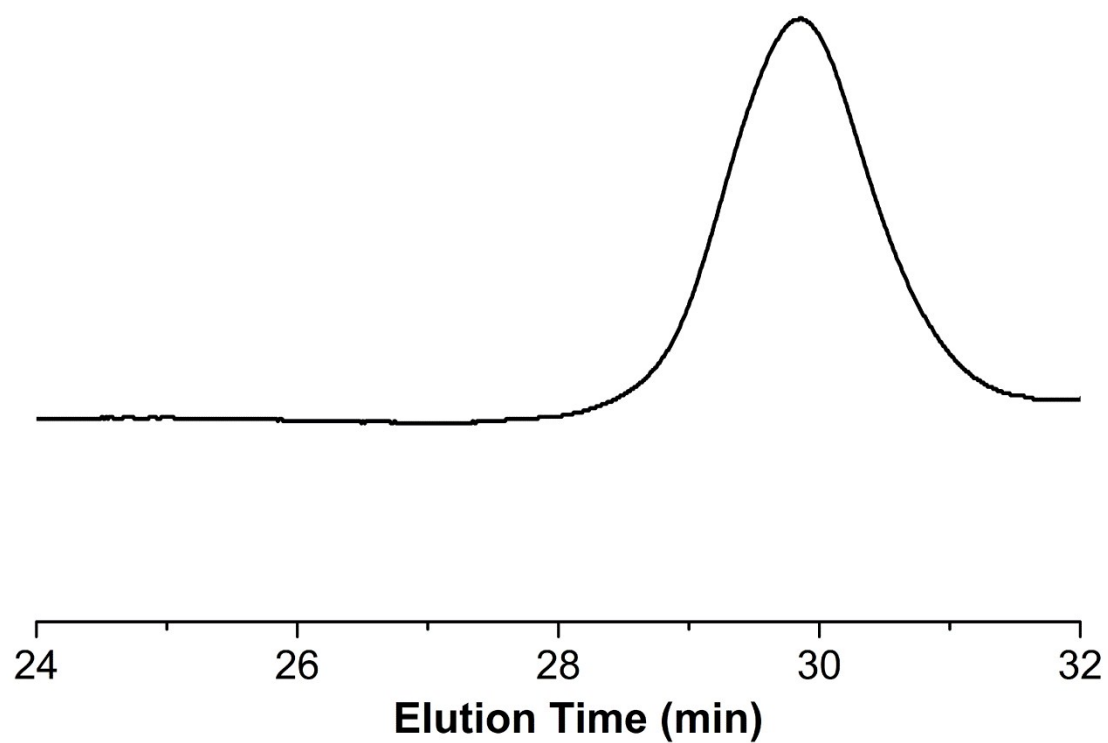

Figure S3. GPC spectra of  $(m\text{PEG-PCL-C})_2$ .
